# Supplementary material
Source: bioRxiv or medRxiv preprint supplement (https://www.biorxiv.org/highwire/filestream/36829/field_highwire_adjunct_files/0/046946-1.pdf)
Supplement: Supplementary file [file 046946-1.pdf]

1 Supporting Information to the paper Zelený, D. Bias in community-weighted mean analysis of  
2 plant functional traits and species indicator values. *Journal of Vegetation Science*.

### 3 **Appendix S1. Description of an algorithm generating simulated community** 4 **data along two environmental gradients (2D simulated community data set)**

5 The model for generating simulated community data was inspired by the COMPAS model  
6 introduced by Minchin (1987). The current implementation builds upon the original one-  
7 gradient version introduced by Fridley et al (2007) and uses also parts of the original script  
8 written by Jason Fridley (published as Appendix S1 in Fridley et al. 2007; for details, see the  
9 original description).

10 Generally, the model is based on two orthogonal ‘environmental’ gradients of equal or  
11 different length (*gradient 1* and *gradient 2*). Along each of these gradients,  $S$  species response  
12 curves with randomly generated optima and niche-widths were generated, representing  
13 potential abundances of species in a given location of the gradient. The species response  
14 curves were modelled using the Beta function, allowing for an asymmetric unimodal shape  
15 (Minchin 1987). In the next step,  $N_p$  sampling locations were randomly selected in the space  
16 defined by the two orthogonal gradients. In each sampling location,  $N_{ind}$  individuals were  
17 randomly assigned to different species. The probability that a particular individual will be  
18 assigned to a certain species was proportional to this species’ potential abundance in a given  
19 sampling location, which equals to square-rooted multiplication of species potential  
20 abundances along the first and the second environmental gradient (as defined by relevant  
21 species response curves).

22 For the purpose of this study, I created 10 community data sets of increasing beta  
23 diversity, while fixing some of the parameters to be constant for all data sets. *Gradient 1* has  
24 the length fixed to 1000 units in all data sets; increasing beta diversity of individual data sets  
25 is achieved by increasing the length of *gradient 2*, which imitates the situation when data set

26 expands over more communities either in ecological or geographical space. The length of  
27 *gradient 2* ranged from 1000 units for “one community” to 10 000 units for “ten  
28 communities”, where *number of communities* is an arbitrary measure with each community  
29 spanning 1000 units along *gradient 2* (see Appendix S1: Fig. S1 for examples of community  
30 data sets composed of one, five and ten communities). With the increasing length of *gradient*  
31 *2*, the number of species in the simulated data set also increased ( $S = 100 \times \textit{number of}$   
32 *communities*), while the number of individuals remained fixed in all data sets to 500  
33 individuals per sample. Niche widths for all species along both gradients were random  
34 numbers generated from the uniform distribution in the range of 500 to 1000 units, and the  
35 number of samples created for each community remained constant ( $N_p = 50$ ; see Appendix  
36 S1: Table S1 for the setting of all parameters). Position of samples along *gradient 1* are used  
37 as the sample attributes, while positions of species optima along *gradient 1* are used as the  
38 species attributes.

39         The increasing number of communities is reflected by an increase in the beta diversity  
40 of the data set, which is quantified as a variation in the matrix of compositional distances  
41 calculated using squared Whittaker distance (Legendre & De Cáceres 2013). Whittaker  
42 distance is one complement of Whittaker’s index of association (Whittaker 1952), and in  
43 Legendre & Legendre (2012) is denoted as  $D_{\phi}$ . It is Manhattan type distance based on species  
44 profiles, comparing species composition of samples by differences in their relative species  
45 abundances. Since CWM calculation is also based on relative species abundances (species  
46 profiles), this measure is suitable for calculation of beta diversity in the context of CWM  
47 analysis.

48         The R code for generating 2D simulated community data is implemented in the R  
49 package *weimea* (Zelený, unpubl., available here as Appendix S5 and also from  
50 <https://github.com/zdealveindy/weimea>) and consists of two functions: *simul.comm.2*, which

51 creates parameters of simulated community with species in 2D space, and *sample.comm.2*,  
52 which samples such simulated community at random or selected positions along both  
53 gradients. Additionally, there is the function *draw.ecospace*, which visualizes the distribution  
54 of species and samples in simulated ecospace (see Appendix S1: Fig. S1), and the function  
55 *betadiv.ia* calculating the beta diversity of the species composition matrix as a variation in the  
56 matrix of squared distances among samples calculated by Whittaker distance.

57

## 58 **References**

59 Fridley, J., Vandermast, D.B., Kuppinger, D.M., Manthey, M. & Peet R.K. 2007. Co-  
60 occurrence based assessment of habitat generalists and specialists: a new approach for the  
61 measurement of niche width. *Journal of Ecology* 95: 707–722.

62 Legendre, P. & Legendre, L. 2012. *Numerical ecology, Third English Edition*. Elsevier  
63 Science, Amsterdam, The Netherlands.

64 Legendre, P. & De Cáceres, M. 2013. Beta diversity as the variance of community data:  
65 dissimilarity coefficients and partitioning. *Ecology Letters* 16: 951–963.

66 Minchin, P.R. 1987. Simulation of multidimensional community patterns: towards a  
67 comprehensive model. *Vegetatio* 71: 145–156.

68 Whittaker, R.H. 1952. A study of summer foliage insect communities in the Great Smoky  
69 Mountains. *Ecological Monographs* 22:1–44.

70

71 **Appendix S1: Table S1**

72 The parameter setting of ten 2D simulated community data sets with increasing beta diversity.  
 73 Parameters for *simulated community data* reflect the setting of the model, while those of  
 74 *sampled data set* indicate average data set parameters calculated from sampling 1000  
 75 simulated community data sets. *Gamma diversity* is the number of species in the data set;  
 76 *mean alpha diversity* is the mean number of species in individual samples; *beta diversity* is  
 77 the variation in the dissimilarity matrix with squared values of Whittaker distance.

| <i>No. of comm.</i> | <b>Simulated community data</b> |                             |                          | <b>Sampled data set</b> |                             |                       |
|---------------------|---------------------------------|-----------------------------|--------------------------|-------------------------|-----------------------------|-----------------------|
|                     | <i>Length of gradient 1</i>     | <i>Length of gradient 2</i> | <i>Number of species</i> | <i>Gamma diversity</i>  | <i>Mean alpha diversity</i> | <i>Beta diversity</i> |
| 1                   | 1000                            | 1000                        | 100                      | 99.3±0.9                | 23.2±1.4                    | 0.621±0.032           |
| 2                   | 1000                            | 2000                        | 200                      | 194.6±3.2               | 25.5±1.3                    | 0.786±0.018           |
| 3                   | 1000                            | 3000                        | 300                      | 283.7±6.2               | 26.2±1.2                    | 0.853±0.013           |
| 4                   | 1000                            | 4000                        | 400                      | 364.7±9.3               | 26.6±1.1                    | 0.888±0.009           |
| 5                   | 1000                            | 5000                        | 500                      | 436.4±13.5              | 26.8±1.1                    | 0.909±0.008           |
| 6                   | 1000                            | 6000                        | 600                      | 500.8±18.0              | 26.9±1.1                    | 0.924±0.007           |
| 7                   | 1000                            | 7000                        | 700                      | 557.8±21.2              | 27.0±1.0                    | 0.934±0.007           |
| 8                   | 1000                            | 8000                        | 800                      | 610.4±24.5              | 27.2±1.0                    | 0.942±0.006           |
| 9                   | 1000                            | 9000                        | 900                      | 653.8±27.8              | 27.2±1.0                    | 0.948±0.006           |
| 10                  | 1000                            | 10000                       | 1000                     | 695.5±31.0              | 27.2±1.0                    | 0.954±0.005           |

78

79

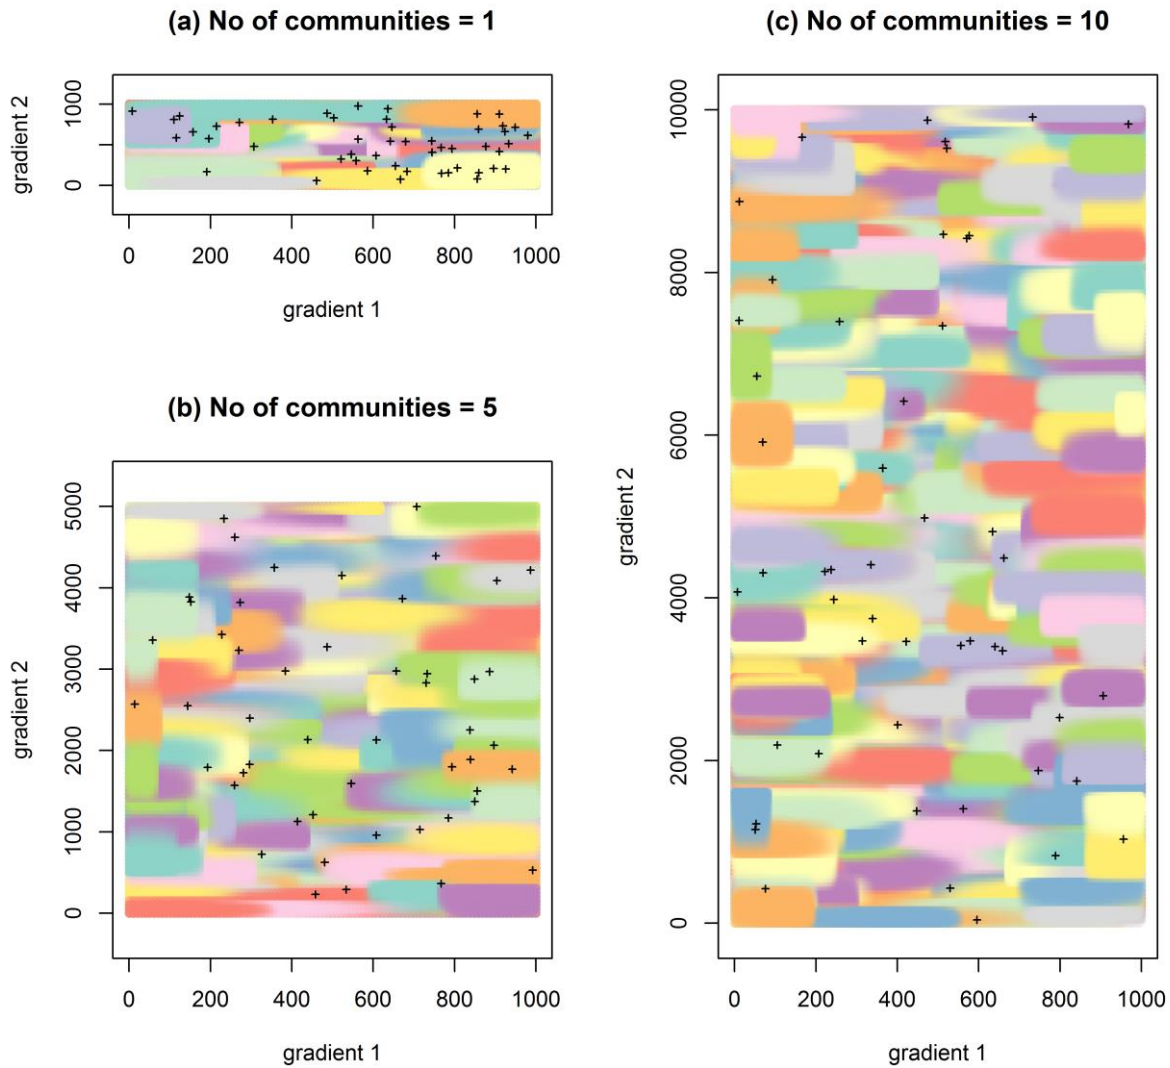

80

81 **Appendix S1: Figure S1**

82 Visualization of the model creating 2D simulated community data set, namely ecospace  
 83 defined by two unevenly long virtual environmental gradients (*gradient 1*, always 1000 units  
 84 long, and *gradient 2*, with range of lengths 1000–10 000 units). Each color represents a region  
 85 with highest probability of occurrence of particular species, and each symbol (cross) indicates  
 86 the sampling location in the ecospace (the realization of one permutation). The models of  
 87 three community data sets with different beta diversity are shown, with numbers of  
 88 communities equal to a) one, b) five and c) ten (with each community equal to 1000 units of  
 89 *gradient 2*).

90
